# Supplementary material for: Genome-Wide Role of HSF1 in Transcriptional Regulation of Desiccation Tolerance in the Anhydrobiotic Cell Line, Pv11
Source: Preprints.org preprint supplement (doi:10.20944/preprints202104.0474.v1), 2021-04-19
Supplement: Supplementary file 2 [file supplementary]

# **Genome-wide role of HSF1 in transcriptional regulation of desiccation tolerance in the anhydrobiotic cell line, Pv11**

Shoko Tokumoto<sup>1,8</sup>, Yugo Miyata<sup>2,8</sup>, Ruslan Deviatiiarov<sup>3,8</sup>, Takahiro G. Yamada<sup>4</sup>, Yusuke Hiki<sup>4</sup>, Olga Kozlova<sup>3</sup>, Yuki Yoshida<sup>5,6</sup>, Richard Cornette<sup>2</sup>, Akira Funahashi<sup>4</sup>, Elena Shagimardanova<sup>3</sup>, Oleg Gusev<sup>3,7</sup>, Takahiro Kikawada<sup>1,2,\*</sup>

\*

<sup>1</sup>Department of Integrated Biosciences, Graduate School of Frontier Sciences, The University of Tokyo, Kashiwa, Japan

<sup>2</sup>Division of Biotechnology, Institute of Agrobiological Sciences, National Institute of Agriculture and Food Research Organization (NARO), Tsukuba, Japan

<sup>3</sup>Extreme Biology laboratory, Institute of Fundamental Medicine and Biology, Kazan Federal University, Kazan, Russia

<sup>4</sup>Department of Biosciences and Informatics, Keio University, Yokohama, Kanagawa, Japan

<sup>5</sup>Institute for Advanced Biosciences, Keio University, Tsuruoka, Yamagata, Japan

<sup>6</sup>Systems Biology Program, Graduate School of Media and Governance, Keio University, Fujisawa, Kanagawa, Japan

<sup>7</sup>Laboratory for Transcriptome Technology, RIKEN Center for Integrative Medical Sciences, RIKEN, Yokohama, Japan

<sup>8</sup>These authors contributed equally to this work: Shoko Tokumoto, Yugo Miyata and Ruslan Deviatiiarov

\*Corresponding author: Takahiro Kikawada. Tel: +81 298386170; Email: kikawada@affrc.go.jp

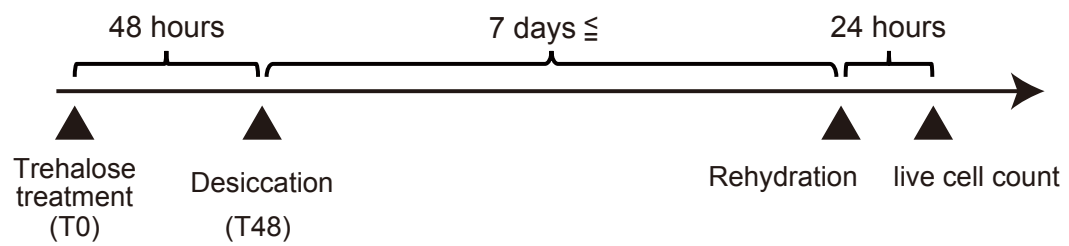

Figure S1. The scheme of trehalose treatment, desiccation and rehydration of Pv11 cells. The cells were incubated in trehalose mixture for 48 h and desiccated at least 7 days in a desiccator.

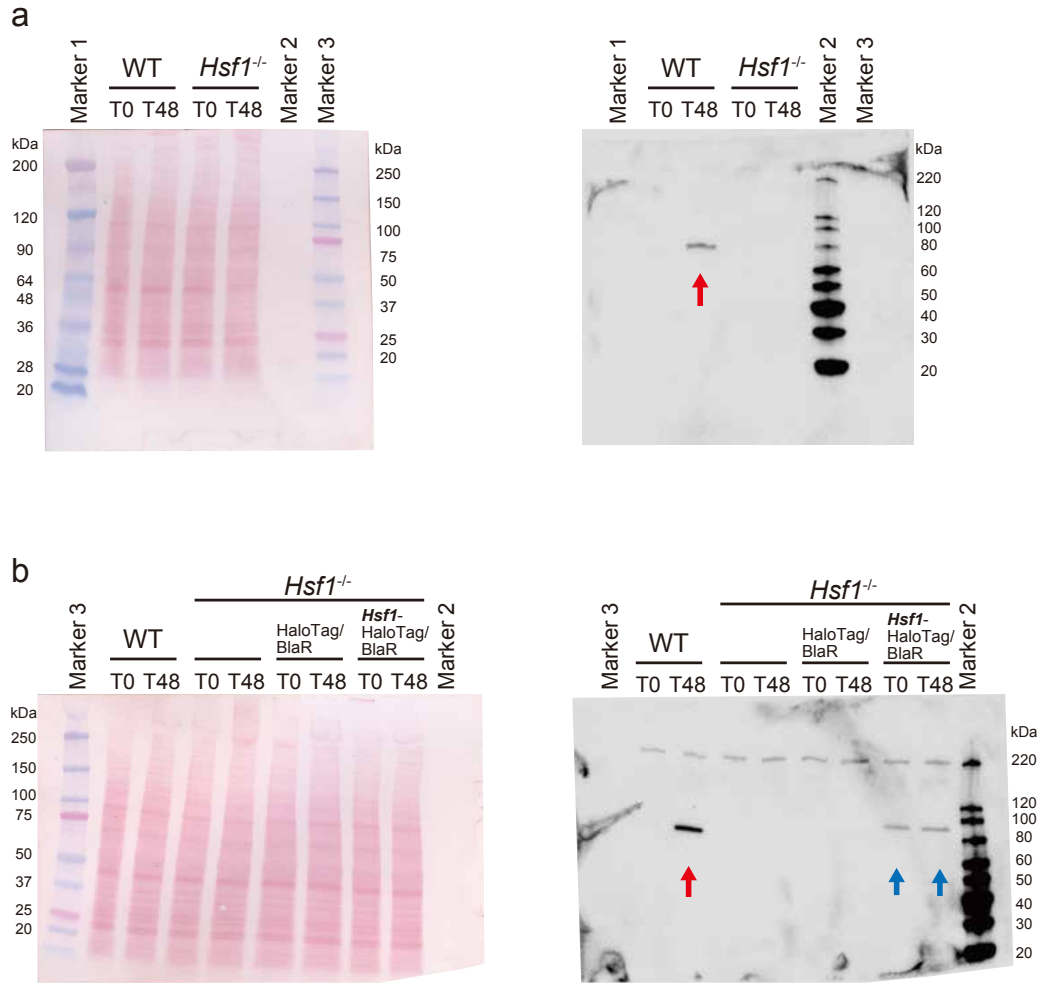

Figure S2. Validation of western blotting analysis in Figure 1c and Figure 2c. (a) Protein blotted membrane with ponceau S stain (left panel) and immune reacted membrane with anti-PvHSF1 antibody (right panel). (b) Protein blotted membrane with ponceau S stain (left panel) and immune reacted membrane with anti-PvHSF1 antibody (right panel). The molecular weight of HSF1 (red arrow) and HSF1-FLAG (blue arrow) is approximately 63 and 68 kDa, respectively, but the detected HSF1 is about 80 kDa probably due to post-translational modification [1,2]. The three types of marker were used (Marker 1, Cat#02525 by Nacalai Tesque; Marker 2, Cat#LC5602 by Thermo Fisher Scientific; Marker 3, Cat#1610374 by Bio-Rad).

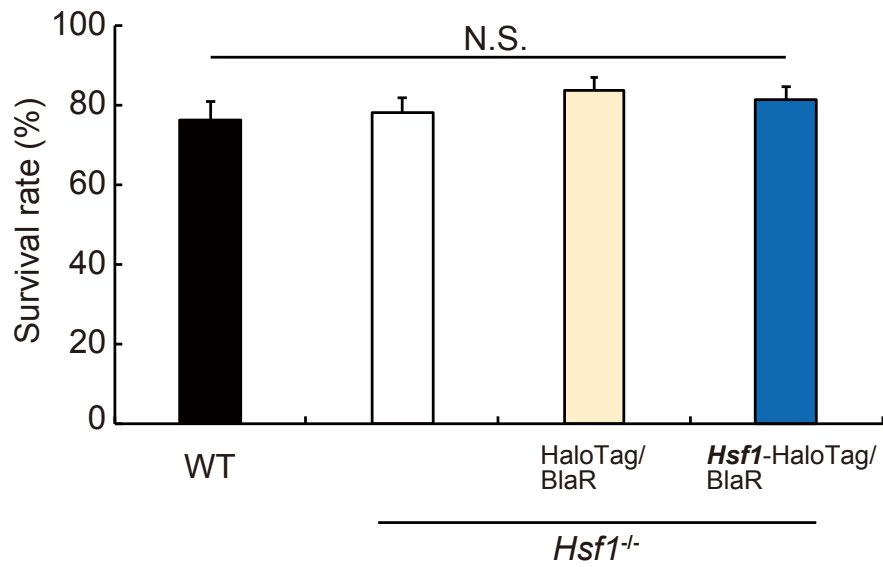

Figure S3. The survival rate of 48 hours after trehalose treatment. The cells were incubated in trehalose mixture at a density of  $2 \times 10^7$  cells per mL for 48 h at 25°C. The survival rate was calculated as the ratio of the number of live cells (Hoechst positive and PI negative) to that of total cells (Hoechst positive). Normalized values are expressed as mean  $\pm$  standard deviation (SD). N.S., not significant; n = 4 in each group.

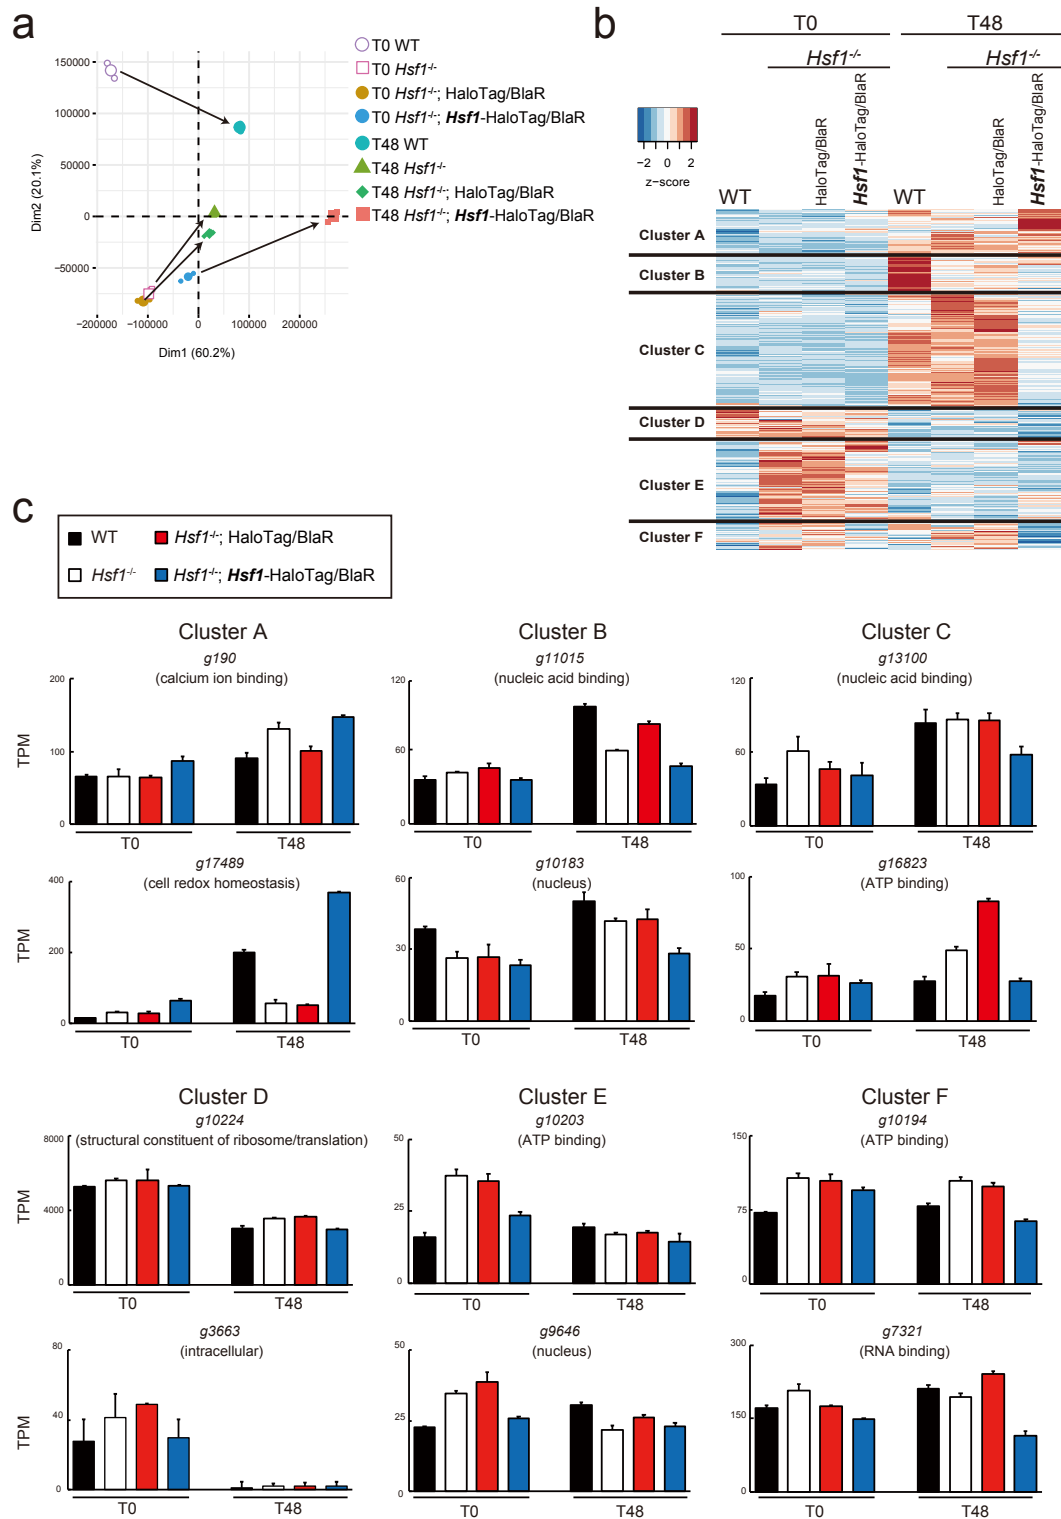

Figure S4. Comparison of the whole-genome transcription profiles of all samples. (a) PCA of all samples. (b) Hierarchical clustering based on TPM. Red and blue color indicates high expression level and low expression level, respectively. The horizontal and vertical axes show sample and the number of DEGs, respectively. (c) Examples of mRNA expression patterns for each cluster in (b).

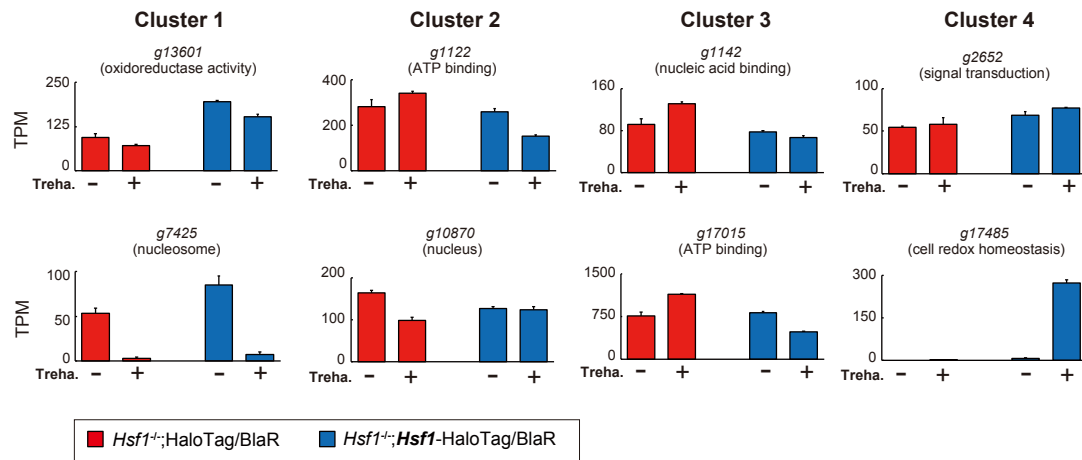

Figure S5. Examples of expression patterns in each cluster in Figure 3a. Treha. -, before trehalose treatment (T0); Treha. +, after trehalose treatment (T48).

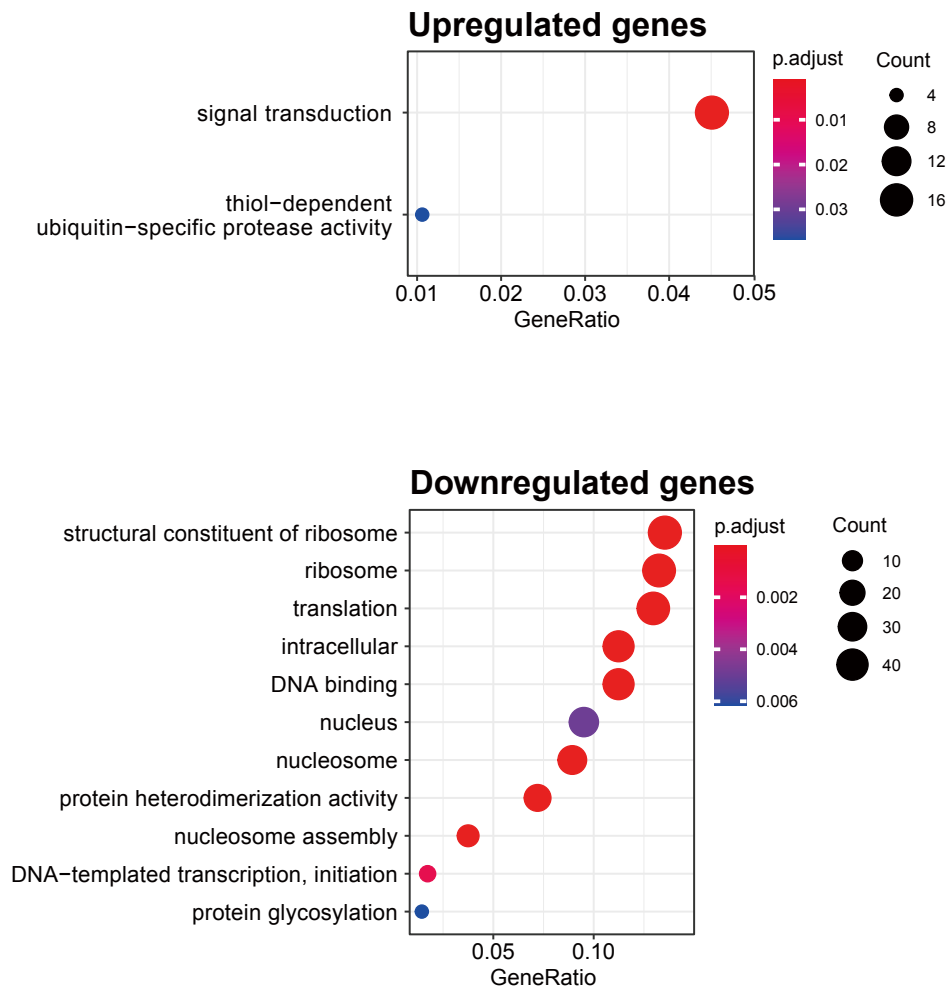

Figure S6. GO analysis of generally up- (upper panel) and downregulated (lower panel) genes in a HSF1-independent manner. All genes with or without GO annotation are shown in Data S7.

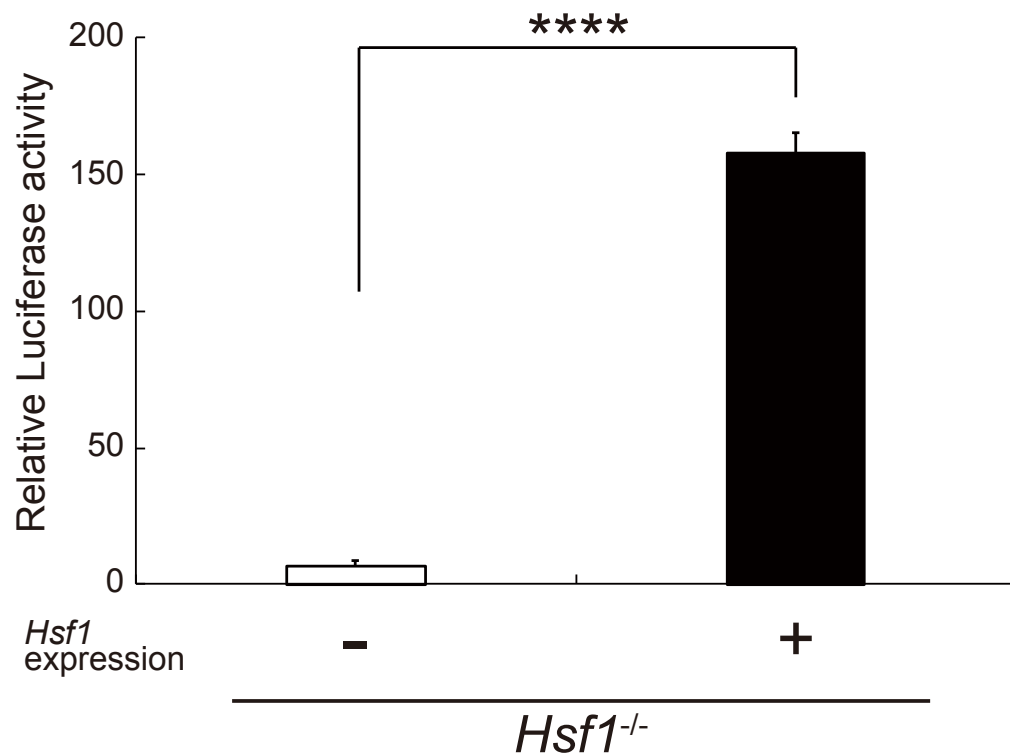

Figure S7. The transcriptional activity of HSF1 via HSE in Pv11 cells. Reporter- and internal control-vectors and either pPv121-*Hsf1* or pPv121-MCS (empty vector) were co-transfected into *Hsf1*<sup>-/-</sup> cells. Two days after transfection, the cells were collected and subjected to luciferase assay. Normalized values are expressed as mean  $\pm$  standard deviation (SD). \*\*\*\* $p < 0.0001$ ;  $n = 4$  in each group.



Table S1. The number of DEGs in Figure 4b.

| Cluster | The number of DEGs |
|---------|--------------------|
| A       | 1043               |
| B       | 843                |
| C       | 2586               |
| D       | 702                |
| E       | 1817               |
| F       | 645                |
| Total   | 7636               |

Clusters were defined by hclust function with ward. D2 method based on Pearson correlation distances.

Table S2. The number of anhydrobiosis-related genes in Figure S4b.

| Gene                                | Cluster |   |   |   |   |   |   |
|-------------------------------------|---------|---|---|---|---|---|---|
|                                     | A       | B | C | D | E | F | * |
| <i>Lea</i>                          | 23      | 1 | 0 | 0 | 0 | 0 | 3 |
| <i>Trx</i>                          | 13      | 2 | 2 | 0 | 1 | 0 | 7 |
| <i>Lil</i>                          | 13      | 0 | 0 | 0 | 0 | 0 | 0 |
| <i>Pimt</i>                         | 12      | 1 | 0 | 0 | 0 | 0 | 0 |
| <i>Trehalose metabolism-related</i> | 3       | 0 | 0 | 1 | 0 | 0 | 0 |

The genes previously reported as anhydrobiosis-related genes are picked up and counted. *Lea*, late embryogenesis abundant proteins; *Trx*, thioredoxins; *Lil*, lea-island-located proteins; *Pimt*, protein-L-isoaspartate (D-aspartate) O-methyltransferases; \*, genes that are not detected as DEGs. Trehalose metabolism-related genes include TPS, TPP, Tret1 and Treh.

Table S3. The number of DEGs in Figure 3a.

| cluster number | the number of DEGs |
|----------------|--------------------|
| 1              | 1140               |
| 2              | 1132               |
| 3              | 2338               |
| 4              | 1320               |
| Total          | 5930               |

Clusters were defined by hclust function with ward. D2 method based on Pearson correlation distances.

Table S4. The number of anhydrobiosis-related genes in each cluster in Figure 3a.

| Gene                     | Cluster |   |   |    |   |
|--------------------------|---------|---|---|----|---|
|                          | 1       | 2 | 3 | 4  | * |
| <i>Lea</i>               | 1       | 0 | 0 | 26 | 0 |
| <i>Trx</i>               | 2       | 0 | 2 | 17 | 4 |
| <i>Lil</i>               | 0       | 0 | 0 | 13 | 0 |
| <i>Pimt</i>              | 0       | 0 | 0 | 13 | 1 |
| <i>Trehalose-related</i> | 1       | 0 | 0 | 1  | 0 |

The genes previously reported as anhydrobiosis-related genes are picked up and counted. *Lea*, late embryogenesis abundant protein; *Trx*, thioredoxin; *Lil*, lea-island-located protein; *Pimt*, protein-L-isoaspartate (D-aspartate) O-methyltransferase; \*, genes that are not detected as DEGs.

Table S5. HSE enrichment analysis.

| Cluster | The number of genes in the presence or absence of HSE* |         | The number of total genes | Sequence similarity (adjusted <i>p</i> -value)** |          |          |          | Sequence similarity (-log2 (adjusted <i>p</i> -value)) |             |             |             |
|---------|--------------------------------------------------------|---------|---------------------------|--------------------------------------------------|----------|----------|----------|--------------------------------------------------------|-------------|-------------|-------------|
|         | presence                                               | absence |                           | MA0486.1                                         | MA0486.2 | MA0770.1 | MA0771.1 | MA0486.1                                               | MA0486.2    | MA0770.1    | MA0771.1    |
| 1       | 331                                                    | 809     | 1140                      | 7.37E-04                                         | 4.31E-03 | 1.19E-05 | 3.92E-06 | 10.40604776                                            | 7.858096415 | 16.3586789  | 17.96071491 |
| 2       | 298                                                    | 834     | 1132                      | -                                                | -        | -        | -        | -                                                      | -           | -           | -           |
| 3       | 605                                                    | 1733    | 2338                      | -                                                | -        | -        | -        | -                                                      | -           | -           | -           |
| 4       | 447                                                    | 873     | 1320                      | 6.79E-07                                         | 4.02E-08 | 5.75E-21 | 2.69E-13 | 20.49008509                                            | 24.56822926 | 67.23692804 | 41.75745906 |

\*The number of genes that have HSE was detected using MEME Suite Fimo. If the *p*-value was less than 0.0001, then recorded as "have HSE genes".

\*\*Motif enrichment analysis done in MEME Suite AME. The optimal enrichment *p*-value of the motif according to the statistical test (Fisher's exact test), adjusted for multiple tests using a Bonferroni correction.

Table S6. Primers for vector constructions.

| Primer set | PCR fragment                                          | forward primer (5'-3')                                                                              | reverse primer (3'-5')                                                                                                       |
|------------|-------------------------------------------------------|-----------------------------------------------------------------------------------------------------|------------------------------------------------------------------------------------------------------------------------------|
| 1          | AcGFP1                                                | AAGAAATATTTTCTGAAAAAGGATCCCAACATGGTGAGC<br>AAGGG                                                    | TGTGGCACCGGAACCCCTGTACAGCTCATCCATG                                                                                           |
| 2          | P2A-ZeoR                                              | GCTGTACAAGGGTTCGGTGCCACAACTTCAGTTTGTAAA<br>GCAGGCCGGAGACGTGGAAGAGAACCCCGACCGATGGCC<br>AAGTTGACCAAGT | TAGGCTTACCTTCGAACCGGGCCCTCTAGATTAGTCCTG                                                                                      |
| 3          | gRNA#2-L $\mu$ H-121-AcGFP1-P2A-ZeoR-R $\mu$ H-gRNA#2 | AGAGCGTGTGTGGCCCGATGGGGGAAATTTAGGTGTCCT<br>GCCACGCGCTGAAAGGAGTG                                     | AGAGCGTGTGTGGCCCGATGGGGTCCGCAATAATTTTGCCAAG<br>ACTTCAATTATGATACATGAATAAACA                                                   |
| 4          | <i>Hsf1</i> cDNA                                      | CAGTGATCTTGAATTCATTTTAGAAAGTGAATC                                                                   | GAGTTTTTCAAAAAAATATTTTATTCATTTCTCAAAAAAA<br>AATTG                                                                            |
| 5          | <i>Hsf1</i> -3xFLAG                                   | AAGAAATATTTTCTGAAAAAGGATCCTAAAAATGCATCC<br>GATCGAGAGTG                                              | TAGGCTTACCTTCGAACCGGGGATTACTTATCGTCATCGTC<br>TTTGTAAATCAATATCATGATCCTTGTAGTCTCCGTCGTGGTCT<br>TATAGTCTGCATTTGTGTAACATTATTIAGC |
| 6          | <i>Hsf1</i> -3xFLAG                                   | GACGTCGAAGAGAACCCCGACCGATGCATCCGATCGAGAG<br>TG                                                      | CACCGGAACCCCTTATCGTCATCGTCTTTGTAAATC                                                                                         |
| 7          | P2A-HaloTag                                           | TGACGATAAGGGTTCGGTGCCACAAAC                                                                         | TTAGGATGTTGTATAAGATTTTAGCCGGAAATCTCGAGCGT<br>C                                                                               |
| 8          | BlaR                                                  | GACGTCGAAGAGAACCCCGACCGATGCGCAAGCCTTTGTC<br>TC                                                      | TTAGGATGTTGTATAAGATTTTAGCCCTCCACACATAACC                                                                                     |
| 9          | pPv202bp promoter                                     | GCTAGCCTCGAGGATATCAAGATCTACAAACACGTTCAAAAT<br>CATATTTTC                                             | CCAACAGTACCGGATTGCCAAGCTTTTTTTCAGAAAAATTT<br>TCTTTTGTGTC                                                                     |
| 10         | PvGapdh promoter                                      | GCTAGCCTCGAGGATATCAAGATCTAATATACTAAGTGTA<br>AGCAATTG                                                | CCAACAGTACCGGATTGCCAAGCTTATCGATCAAAATTCTAA<br>CTTTAG                                                                         |
| 11         | <i>Hsf1</i>                                           | AAGAAATATTTTCTGAAAAAGgatacaATGCATCCGATCGAG<br>AGTG                                                  | TAGGCTTACCTTCGAACCGGGGTTATGTCATTTGTGTAACAT<br>TATTTAGC                                                                       |

The primers were designed using the NEBuilder Assembly Tool Verdon1 (<https://nebuilderv1.neb.com/>).

Table S7. The combination of transfected donor vectors.

| Established cell line                                         | Donor Vectors                                                |                                  |
|---------------------------------------------------------------|--------------------------------------------------------------|----------------------------------|
|                                                               | 1                                                            | 2                                |
| <i>Hsf1</i> <sup>-/-</sup>                                    | pCR- <i>Hsf1</i> gRNA $\mu$ H-121-AcGFP1-P2A-ZeoR            | -                                |
| <i>Hsf1</i> <sup>-/-</sup> ; HaloTag/BlaR                     | pCR4-g7775 gRNA $\mu$ H-P2A-HaloTag                          | pCR4-g7775 gRNA $\mu$ H-P2A-BlaR |
| <i>Hsf1</i> <sup>-/-</sup> ; <b><i>Hsf1</i></b> -HaloTag/BlaR | pCR4-g7775 gRNA $\mu$ H-P2A- <i>Hsf1</i> -3xFLAG-P2A-HaloTag | pCR4-g7775 gRNA $\mu$ H-P2A-BlaR |

These donor vectors were transfected at a concentration of 0.03-0.1 pmol. The pCR4-g7775 gRNA $\mu$ H-P2A-BlaR was previously constructed in our study.

Table S8. Processing and mapping.

| Sample                                              | Picard: deduplication stats |                 |                         |                            |                    |          | HTSseq Count |           |                      |            |
|-----------------------------------------------------|-----------------------------|-----------------|-------------------------|----------------------------|--------------------|----------|--------------|-----------|----------------------|------------|
|                                                     | Unique Pairs                | Unique Unpaired | Duplicate Pairs Optical | Duplicate Pairs Nonoptical | Duplicate Unpaired | Unmapped | Assigned     | Ambiguous | Alignment Not Unique | No Feature |
| WT_T0-1                                             | 17744216                    | 342796          | 8315886                 | 2359710                    | 2769595            | 7099497  | 13581193     | 67607     | 2454183              | 16791903   |
| WT_T0-2                                             | 16500192                    | 342324          | 6917798                 | 2060926                    | 2499355            | 6102539  | 12203353     | 58993     | 2088677              | 15098654   |
| WT_T0-3                                             | 15312082                    | 331501          | 6406878                 | 1922688                    | 2387537            | 5908090  | 11331144     | 56747     | 1961295              | 14067660   |
| WT_T48-1                                            | 21014452                    | 213900          | 7130992                 | 2224304                    | 1391125            | 3772231  | 13485192     | 77778     | 2666206              | 17308323   |
| WT_T48-2                                            | 16417312                    | 357996          | 5141460                 | 1649528                    | 2096162            | 4450720  | 10857269     | 63133     | 2055070              | 13780777   |
| WT_T48-3                                            | 18687444                    | 372268          | 6003902                 | 1932704                    | 2373327            | 5105643  | 12369050     | 69711     | 2495303              | 15814718   |
| <i>Hsf1</i> <sup>+/+</sup> _T0-1                    | 11566222                    | 283256          | 3694462                 | 1199564                    | 1482908            | 4073576  | 7840554      | 31605     | 1554338              | 9620138    |
| <i>Hsf1</i> <sup>+/+</sup> _T0-2                    | 16475896                    | 324917          | 6651050                 | 1959260                    | 2256786            | 5953237  | 11803954     | 44565     | 2416198              | 14756602   |
| <i>Hsf1</i> <sup>+/+</sup> _T0-3                    | 14369316                    | 295517          | 5016442                 | 1578746                    | 1780813            | 4838876  | 9874913      | 37053     | 1818693              | 12281064   |
| <i>Hsf1</i> <sup>+/+</sup> _T48-1                   | 15977990                    | 359528          | 4942972                 | 1578632                    | 2135979            | 4538837  | 10767831     | 56099     | 1746029              | 13327710   |
| <i>Hsf1</i> <sup>+/+</sup> _T48-2                   | 15592832                    | 367219          | 4769592                 | 1508048                    | 2125092            | 4468649  | 10445405     | 57272     | 1681196              | 13036487   |
| <i>Hsf1</i> <sup>+/+</sup> _T48-3                   | 16642358                    | 351026          | 5010360                 | 1629448                    | 2086748            | 4484900  | 11000242     | 56393     | 1802682              | 13799185   |
| <i>Hsf1</i> <sup>-/-</sup> _HaloTag/BlaR_T0-1       | 18724702                    | 345213          | 7428008                 | 2245278                    | 2579265            | 6942892  | 13394818     | 51410     | 2634959              | 16732763   |
| <i>Hsf1</i> <sup>-/-</sup> _HaloTag/BlaR_T0-2       | 16580826                    | 349540          | 7021872                 | 2076316                    | 2578817            | 7168081  | 12302148     | 44152     | 2604377              | 15141072   |
| <i>Hsf1</i> <sup>-/-</sup> _HaloTag/BlaR_T0-3       | 11985794                    | 91953           | 3336414                 | 1122744                    | 464592             | 2718931  | 7221398      | 24164     | 1451290              | 9193863    |
| <i>Hsf1</i> <sup>-/-</sup> _HaloTag/BlaR_T48-1      | 13982080                    | 306981          | 4033148                 | 1295468                    | 1652659            | 3805156  | 9068587      | 43179     | 1630689              | 11377734   |
| <i>Hsf1</i> <sup>-/-</sup> _HaloTag/BlaR_T48-2      | 15287954                    | 358049          | 4507072                 | 1475838                    | 2056979            | 4372218  | 10002489     | 51488     | 1891966              | 12740146   |
| <i>Hsf1</i> <sup>-/-</sup> _HaloTag/BlaR_T48-3      | 15994514                    | 454301          | 4851628                 | 1550136                    | 2686613            | 5370326  | 10713183     | 54528     | 2279123              | 13730426   |
| <i>Hsf1</i> <sup>-/-</sup> _Hsf1-HaloTag/BlaR_T0-1  | 20893958                    | 364191          | 8914736                 | 2722020                    | 3085420            | 8832121  | 15355239     | 75142     | 3305042              | 19168520   |
| <i>Hsf1</i> <sup>-/-</sup> _Hsf1-HaloTag/BlaR_T0-2  | 12509068                    | 277047          | 4310538                 | 1367584                    | 1650998            | 4973597  | 8471134      | 43691     | 1846041              | 10769287   |
| <i>Hsf1</i> <sup>-/-</sup> _Hsf1-HaloTag/BlaR_T0-3  | 13211692                    | 292794          | 4616150                 | 1459502                    | 1802256            | 5228012  | 9058347      | 44689     | 1803089              | 11463973   |
| <i>Hsf1</i> <sup>-/-</sup> _Hsf1-HaloTag/BlaR_T48-1 | 13924608                    | 351484          | 4626958                 | 1430084                    | 2142129            | 4838909  | 9449334      | 71880     | 1819781              | 12086436   |
| <i>Hsf1</i> <sup>-/-</sup> _Hsf1-HaloTag/BlaR_T48-2 | 20366672                    | 391239          | 7783968                 | 2370782                    | 3080089            | 6871950  | 14486439     | 103533    | 2658170              | 18210162   |
| <i>Hsf1</i> <sup>-/-</sup> _Hsf1-HaloTag/BlaR_T48-3 | 15107630                    | 317984          | 5027232                 | 1579068                    | 2000832            | 4712646  | 10202281     | 72470     | 1859158              | 12879622   |

Unique Pairs: the number of unique read pairs

Unique Unpaired: the number of unique single reads

Duplicate Pairs Optical: the number of cases when single cluster has falsely been called as two by Illumina software

Duplicate Pairs Nonoptical: the number of duplicates in nearby wells, PCR, and sister strand duplicates

Duplicate Unpaired: the number of unpaired duplicates

Unmapped: the number of unmapped reads

Assigned: the number of unique reads assigned to single feature (gene)

Ambiguous: the number of reads matched to more than one features

Alignment Not Unique: the number of not uniquely aligned reads

No Feature: the number of reads without any assigned features



Table S9. Primers for ChIP-qPCR in Figure 4c.

| Target                 | forward primer (5'-3') | reverse primer (3'-5')   |
|------------------------|------------------------|--------------------------|
| <i>g16187</i> promoter | TCCTGAGGCATCTTAACACC   | CTGCACAAACTGCTCAGGAA     |
| <i>g16356</i> promoter | TTTTTCGGCAAATTTTCT     | TGGATCATTGATGCGACAGT     |
| <i>g17488</i> promoter | CGGTCTGGGATTTTCTTTC    | TTTCTCGAATATTGCTTAAATTTT |
| <i>g5646</i> promoter  | TTTTCTTGCCTTTTGAAAT    | TTCTCGAATGTTCATTTTGC     |

The primers were designed using the Primer3Plus (<http://www.bioinformatics.nl/cgi-bin/primer3plus/primer3plus.cgi>).

## Supplementary materials and methods

### Vector construction

To construct the p-3×HSE-Pv202bp-Nluc reporter vector, first, pPv202bp-Nluc was constructed. The Pv202bp minimal promoter [3] was cloned and amplified using specific primers (Table S6: set 9) from pTetO-202bp-AcGFP1[3] and inserted between HindIII and BglII sites of pNL1.1 (Promega, Fitchburg, WI) using NEBuilder HiFi DNA Assembly Mater Mix. To insert the tandemly repeated HSE sequence (MA0486.1, <http://jaspar.genereg.net/>) into the pPv202bp-Nluc, the vector was digested with BglII and EcoRV and the digested small fragment was replaced with the HSE sequence generated by annealing the following oligonucleotides: sense: 5'-ATCcTTCtaGAAacTTCtcTTCtaGAAacTTCtcTTCtaGAAacTTCtA-3'; antisense: 5'-GATCTaGAAgtTTCtaGAAgaGAAgtTTCtaGAAgaGAAgtTTCtaGAAgGAT-3' (p-3×HSE-Pv202bp-Nluc; Data S16). For construction of the luc2-reference vector, the *PvGapdh* promoter was amplified from pPGK vector [4] by PCR (Table S6: set 10) and inserted between HindIII and BglII sites of pGL4.10 (Promega) using NEBuilder HiFi DNA Assembly Mater Mix (pPvGapdh-luc2: Data S17). For construction of pPv121-*Hsfl* expression vector, *Hsfl* ORF was amplified with specific primers (Table S6: set 11) from cDNA of dried *P. vanderplanki* larvae and inserted pPv121-MCS [3] digested with BamHI and SacII using NEBuilder HiFi DNA Assembly Mater Mix (pPv121-*Hsfl*: Data S18).

### Transfection and luciferase assay

The *Hsfl*<sup>-/-</sup> cells were seeded at a density of  $3 \times 10^5$  cells per mL into a 25 cm<sup>2</sup> cell culture flask and grown at 25°C for 4-6 days before transfection. Transfection into Pv11 cells was carried out using a NEPA21 Super Electroporator (Nepa Gene). A mixture of 0.5 µg of either pPv121-*Hsfl* or pPv121-MCS, 2 µg p-3×HSE-Pv202bp-Nluc reporter vector and 5 µg PvGapdh-luc2 vector was transfected into the cells. Two days after transfection, the cells were collected, and luciferase activity was measured using an ARVO luminometer (PerkinElmer, Waltham, MA) with the Nano-Glo Dual-Luciferase Reporter Assay System (Promega).

### HSF1-independent genes selection

To obtain genes that are generally up- and downregulated by HSF1-independent manner during trehalose treatment in Pv11 cells, no-DE genes (FDR > 0.05) were analyzed. FDR and log2FC values were calculated by comparison of TPM of *Hsfl*<sup>-/-</sup>;HaloTag/BlaR between T0 vs T48 and of *Hsfl*<sup>-/-</sup>;Hsfl-HaloTag/BlaR between T0 vs T48, then genes were extracted if the FDR is less than 0.05 in

both cells. Up- and downregulated genes were determined with log2FC values: log2FC >0, upregulated genes; log2FC <0, downregulated genes (Data S6).

## References

1. Hietakangas, V.; Ahlskog, J.K.; Jakobsson, A.M.; Hellesuo, M.; Sahlberg, N.M.; Holmberg, C.I.; Mikhailov, A.; Palvimo, J.J.; Pirkkala, L.; Sistonen, L. Phosphorylation of serine 303 is a prerequisite for the stress-inducible SUMO modification of heat shock factor 1. *Mol Cell Biol* **2003**, *23*, 2953-2968, doi:10.1128/mcb.23.8.2953-2968.2003.
2. Xu, Y.M.; Huang, D.Y.; Chiu, J.F.; Lau, A.T. Post-translational modification of human heat shock factors and their functions: a recent update by proteomic approach. *J Proteome Res* **2012**, *11*, 2625-2634, doi:10.1021/pr201151a.
3. Tokumoto, S.; Miyata, Y.; Usui, K.; Deviatiiarov, R.; Ohkawa, T.; Kondratieva, S.; Shagimardanova, E.; Gusev, O.; Cornette, R.; Itoh, M., et al. Development of a Tet-On Inducible Expression System for the Anhydrobiotic Cell Line, Pv11. *Insects* **2020**, *11*, doi:10.3390/insects11110781.
4. Sogame, Y.; Okada, J.; Kikuta, S.; Miyata, Y.; Cornette, R.; Gusev, O.; Kikawada, T. Establishment of gene transfer and gene silencing methods in a desiccation-tolerant cell line, Pv11. *Extremophiles* **2017**, *21*, 65-72, doi:10.1007/s00792-016-0880-4.
